# Supplementary material for: Chemical Analysis of a “Miller-Type” Complex Prebiotic Broth: Part II: Gas, Oil, Water and the Oil/Water-Interface
Source: PubMed Central journal article supplement (PMC5705758; doi:10.1007/s11084-016-9528-8), 2016-11-28
Supplement: 11084_2016_9528_MOESM1_ESM.pdf [file 11084_2016_9528_MOESM1_ESM.pdf]

| Name                                      | Molecular formula                             | Structure | Probability [%] | Delay time [min] | Relative height/ area [% / %] |
|-------------------------------------------|-----------------------------------------------|-----------|-----------------|------------------|-------------------------------|
| Methyl alcohol                            | CH <sub>4</sub> O                             |           | 43.5            | 0.28             | 80.63 / n.a.                  |
| Methane                                   | CH <sub>4</sub>                               |           | 21.1            |                  |                               |
| 3-Methyl-1,2-diazirine                    | C <sub>2</sub> H <sub>4</sub> N <sub>2</sub>  |           | 54.6            | 0.28             | 100 / n.a.                    |
| Acetylene                                 | C <sub>2</sub> H <sub>2</sub>                 |           | 96.5            | 0.30             | 88.47 / 100                   |
| 1-Buten-3-yne                             | C <sub>4</sub> H <sub>4</sub>                 |           | 95.2            | 0.31             | 11.91 / n.a.                  |
| 1,3-Cyclopentadiene, 1-methyl             | C <sub>6</sub> H <sub>8</sub>                 |           | 35.3            | 0.33             | 5.00 / 2.71                   |
| Benzene                                   | C <sub>6</sub> H <sub>6</sub>                 |           | 77.3            | 0.43             | 7.08 / 26.08                  |
| 1,3-Butadiyne                             | C <sub>4</sub> H <sub>2</sub>                 |           | 98.7            | 0.45             | 8.28 / n.a.                   |
| Hepta-4,6-diyne-2-ol                      | C <sub>7</sub> H <sub>8</sub> O               |           | 67.8            | 0.48             | 5.22 / n.a.                   |
| Toluene                                   | C <sub>7</sub> H <sub>8</sub>                 |           | 47.7            | 0.59             | 4.42 / 38.89                  |
| Water                                     | H <sub>2</sub> O                              |           | 92.1            | 0.70             | 18.76 / n.a.                  |
| Hepta-4,6-diyne-2-ol                      | C <sub>7</sub> H <sub>8</sub> O               |           | 60.2            | 0.71             | 12.34 / 39.62                 |
| Ethylbenzene                              | C <sub>8</sub> H <sub>10</sub>                |           | 61.0            | 0.85             | 4.29 / 3.91                   |
| 2,4-Hexadiyne                             | C <sub>6</sub> H <sub>6</sub>                 |           | 43.6            | 0.91             | 4.04 / 4.49                   |
| 1,5-Hexadien-3-yne                        | C <sub>6</sub> H <sub>6</sub>                 |           | 21.2            |                  |                               |
| Bicyclo[4.1.0]octa-1,3,5-triene-7,8-dione | C <sub>8</sub> H <sub>4</sub> O <sub>2</sub>  |           | 48.8            | 1.07             | 3.14 / 27.35                  |
| Oxiranecarboxamide, 3-phenyl-             | C <sub>9</sub> H <sub>9</sub> NO <sub>2</sub> |           | 54.5            | 1.10             | 3.85 / n.a.                   |

|                                  |                   |                                                                                     |      |      |             |
|----------------------------------|-------------------|-------------------------------------------------------------------------------------|------|------|-------------|
| Bicyclo[4.1.0]hepta-1,3,5-triene | $C_7H_6$          |    | 88.8 | 1.32 | 3.19 / 7.23 |
| Benzene, 1,2,3-trimethyl-        | $C_9H_{12}$       |    | 12.4 | 1.37 | 3.07 / 2.94 |
| Benzene, (1-methylethyl)-        | $C_9H_{12}$       |    | 8.27 |      |             |
| 1-Propoxypropan-2-yl benzoate    | $C_{13}H_{18}O_3$ |    | 8.27 |      |             |
| Styrene                          | $C_8H_8$          |    | 30.6 | 1.61 | 3.44 / 9.49 |
| Bicyclo[4.1.0]octa-1,3,5-triene  | $C_8H_8$          |    | 28.3 |      |             |
| 1,3,5,7-Cyclooctatetraene        | $C_8H_8$          |    | 26.1 |      |             |
| Hexa-1,3,5-triyne                | $C_6H_2$          |    | 96.7 | 2.56 | 2.66 / 3.53 |
| Phenylethyne                     | $C_8H_6$          |   | 89.4 | 2.82 | 2.75 / 7.02 |
| 1H-Indene, 1-chloro-2,3-dihydro- | $C_9H_9Cl$        |  | 29.1 | 4.21 | 2.04 / 2.86 |
| Indene                           | $C_9H_8$          |  | 26.9 |      |             |
| Benzene, 1-propynyl              | $C_9H_8$          |  | 24.7 | 4.54 | 1.72 / 6.64 |
| 2-Methylphenylacetylene          | $C_9H_8$          |  | 23.8 |      |             |
| 2-Thiazolidinecarboxylic acid    | $C_4H_7NO_2S$     |  | 32.9 | 4.68 | 2.14 / 2.86 |

|                                                              |                    |                                                                                     |       |      |             |
|--------------------------------------------------------------|--------------------|-------------------------------------------------------------------------------------|-------|------|-------------|
| Benzeno, 1-ethynyl-4-methyl-                                 | $C_9H_8$           | 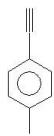   | 50.0  | 5.04 | 1.44 / 2.08 |
| Divinyl(N-methylcarbamoyloxy methyl)silane                   | $C_8H_{15}NO_2Si$  |    | 34.6  | 5.70 | 1.58 / 3.22 |
| 2-Methylindene                                               | $C_{10}H_{10}$     |    | 21.5  | 5.76 | 1.86 / 2.36 |
| 1,4-Methanonaphthalene-9-one, 1,2,3,4-tetrahydro-            | $C_{11}H_{10}O$    |    | 16.5  |      |             |
| 1H-Indene, 3-methyl-                                         | $C_{10}H_{10}$     |    | 10.6  |      |             |
| d-Proline, N-methoxycarbonyl-, nonyl ester                   | $C_{16}H_{29}NO_4$ |    | 7.44  | 7.79 | 1.41 / 4.75 |
| d-Proline, N-methoxycarbonyl-, dodecyl ester                 | $C_{19}H_{35}NO_4$ |  | 5.84  |      |             |
| d-Proline, N-methoxycarbonyl-, octadecyl ester               | $C_{25}H_{47}NO_4$ |  | 4.94  |      |             |
| 4a,8a-(Methaniminomethano)naphthalene-9,11-dione, 10-phenyl- | $C_{18}H_{13}NO_2$ |  | 46.90 | 7.87 | 1.42 / 5.30 |

|                                                      |                      |                                                                                     |      |       |             |
|------------------------------------------------------|----------------------|-------------------------------------------------------------------------------------|------|-------|-------------|
| Acetamide, 2-(1-piperidyl)-N-(6-chloropyrazin-2-yl)- | $C_{11}H_{15}ClN_4O$ | 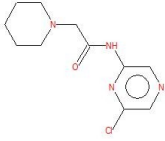   | 29.3 | 8.08  | 1.69 / 5.89 |
| Naphthalene                                          | $C_{10}H_8$          |    | 49.5 | 8.32  | 1.10 / n.a. |
| Azulene                                              | $C_{10}H_8$          |    | 37.9 |       |             |
| 1,4-Diethynylbenzene                                 | $C_{10}H_6$          |    | 47.9 | 10.50 | 1.23 / 3.96 |
| Carbonic acid, phenyl undec-10-enyl ester            | $C_{18}H_{26}O_3$    |    | 22.3 | 15.36 | 0.69 / 3.93 |
| Carbonic acid, pentadecyl phenyl ester               | $C_{22}H_{36}O_3$    |    | 16.6 |       |             |
| Acenaphthylene                                       | $C_{12}H_8$          |    | 64.5 | 15.45 | 0.84 / 4.94 |
| Caprolactam                                          | $C_8H_{11}NO$        |   | 78.0 | 16.00 | 0.60 / n.a. |
| Vinyl 2-ethylhexanoate                               | $C_{10}H_{18}O_2$    |  | 30.4 | 18.37 | 0.75 / 3.38 |
| 1,2(4H)-Oxazine-3-ol, 5,6-dihydro-6-oxo-, benzoate   | $C_{11}H_9NO_4$      |  | 19.1 | 19.62 | 0.63 / 1.48 |
| 9H-Fluorene, 9-methylene                             | $C_{14}H_{10}$       |  | 28.9 | 22.33 | 0.70 / 4.00 |
| Phenanthrene                                         | $C_{14}H_{10}$       |  | 25.6 |       |             |

|                                           |                    |                                                                                   |      |       |             |
|-------------------------------------------|--------------------|-----------------------------------------------------------------------------------|------|-------|-------------|
| Phthalic acid, 4-cyanophenyl heptyl ester | $C_{22}H_{23}NO_4$ | 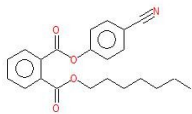 | 12.4 | 23.24 | 0.48 / n.a. |
| Phthalic acid, cyclobutyl tridecyl ester  | $C_{25}H_{38}O_4$  |  | 8.26 |       |             |
| Resorcinol                                | $C_6H_6O_2$        |  | 18.9 | 27.51 | 0.68 / 3.53 |
| Hydroquinone                              | $C_6H_6O_2$        |  | 18.9 |       |             |

Table 1: Detected molecules from *A3.1<sub>gas</sub>* as obtained using the NIST database as a reference. For low-percentage matches several possible molecules are listed. The highest peak, or the largest peak area in the chromatogram are used as references. Heights and areas of other peaks from other substances are given as a percentage relative to the respective reference and taken as their relative abundances. Not available (n.a.) area means that the area could not be determined due to asymmetric or overlapping peaks. Note that both estimates (height vs. area) can differ more or less, depending on the precise shape of a peak. Molecules containing elements other than *C*, *H*, *N* and *O* may represent mismatches in the database, or a contamination from the cleaning solution (*Deconex*, Borer).

| Name                                      | Molecular formula | Structure                                                                           | Probability [%] | Delay time [min] | Relative height/ area [%] |
|-------------------------------------------|-------------------|-------------------------------------------------------------------------------------|-----------------|------------------|---------------------------|
| 3-Methyl-1,2-diazirine                    | $C_2H_3N_2$       |    | 66.1            | 0.30             | 100 / 0.28                |
| 1-Buten-3-yne                             | $C_4H_4$          |    | 95.2            | 0.31             | 99.55 / 100               |
| Ammonia                                   | $H_3N$            |    | 98.0            | 0.35             | 12.68 / 10.62             |
| 2-Cyanosuccinonitrile                     | $C_5H_3N_3$       |    | 59.4            | 0.44             | 5.10 / 0.62               |
| 1,3-Butadiyne                             | $C_4H_2$          |    | 91.2            | 0.46             | 9.11 / 6.34               |
| Sulfur dioxide                            | $O_2S$            |    | 69.0            | 0.49             | 6.46 / 1.81               |
| Toluene                                   | $C_7H_8$          |    | 50.2            | 0.61             | 2.59 / n.a.               |
| Water                                     | $H_2O$            |    | 94.7            | 0.71             | 13.06 / n.a.              |
| Hepta-4,6-diyne-2-ol                      | $C_7H_{10}O$      |    | 46.5            | 0.72             | 10.81 / n.a.              |
| Ethylbenzene                              | $C_8H_{10}$       |   | 43.1            | 0.88             | 2.12 / 0.27               |
| Benzene, 1,3-dimethyl-                    | $C_8H_{10}$       |  | 27.0            |                  |                           |
| Bicyclo[4.2.0]octa-1,3,5-triene-7,8-dione | $C_8H_6O_2$       |  | 49.2            | 1.08             | 2.00 / 0.72               |
| 4,6-Octadiyn-3-one, 2-methyl-             | $C_{10}H_{10}O$   |  | 77.0            | 1.18             | 1.90 / 0.36               |
| Bicyclo[4.1.0]hepta-1,3,5-triene          | $C_7H_8$          |  | 83.5            | 1.33             | 1.46 / n.a.               |
| Acetic acid, sodium salt                  | $C_2H_3NaO_2$     |  | 90.8            | 1.40             | 1.52 / n.a.               |
| 1,3,5,7-Cyclooctatetraene                 | $C_8H_8$          |  | 34.6            |                  |                           |

|                                                 |                   |                                                                                     |      |      |             |
|-------------------------------------------------|-------------------|-------------------------------------------------------------------------------------|------|------|-------------|
| Styrene                                         | $C_8H_8$          | 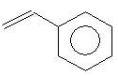   | 26.5 | 1.68 | 1.50 / 0.29 |
| Bicyclo[4.2.0]octa-1,3,5-triene                 | $C_8H_8$          |    | 24.5 |      |             |
| Bicyclo[4.1.0]hepta-1,3,5-triene                | $C_7H_8$          |    | 56.5 | 2.32 | 1.41 / 0.46 |
| Hexa-1,3,5-triyne                               | $C_6H_2$          |    | 96.8 | 2.58 | 1.22 / 0.51 |
| 3-Phenyl-1-propanol, acetate                    | $C_{11}H_{14}O_2$ |    | 22.5 | 2.66 | 1.29 / 0.30 |
| Indane                                          | $C_9H_{10}$       |    | 14.6 |      |             |
| Propanoic acid, 2-methyl-, 3-phenylpropyl ester | $C_{13}H_{18}O_2$ |    | 11.2 |      |             |
| Phenylethyne                                    | $C_8H_6$          |    | 88.8 | 2.85 | 1.26 / n.a. |
| Indene                                          | $C_9H_8$          |  | 23.1 | 4.26 | 1.06 / n.a. |
| Benzene, 1-propynyl-                            | $C_8H_6$          |  | 16.3 |      |             |
| Benzene, 1-ethynyl-4-methyl-                    | $C_9H_8$          |  | 13.8 |      |             |
| 2-Thiazolidinecarboxylic acid                   | $C_3H_5NO_2S$     |  | 35.3 | 4.69 | 1.06 / 0.48 |
| Benzene, 1-ethynyl-4-methyl-                    | $C_9H_8$          |  | 83.9 | 5.02 | 1.14 / n.a. |

|                                                                                     |                       |                                                                                     |      |      |             |
|-------------------------------------------------------------------------------------|-----------------------|-------------------------------------------------------------------------------------|------|------|-------------|
| Thiophene, 2-(methylthio)-                                                          | $C_6H_6S_2$           | 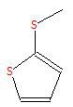   | 48.5 |      |             |
| 1H-Phosphole, 2,3-dihydro-1,4-dimethyl-, 1-oxide                                    | $C_7H_{11}OP$         |    | 32.3 |      |             |
| l-Norvaline, N-methoxycarbonyl-, heptyl ester                                       | $C_{15}H_{29}NO_4$    |    | 26.2 |      |             |
| l-Norvaline, N-methoxycarbonyl-, octyl ester                                        | $C_{16}H_{31}NO_4$    |    | 16.9 | 5.85 | 0.92 / n.a. |
| l-Norvaline, N-methoxycarbonyl-, pentyl ester                                       | $C_{12}H_{23}NO_4$    |    | 16.3 |      |             |
| Benzonitrile                                                                        | $C_7H_5N$             |    | 73.2 | 6.29 | 0.86 / 0.52 |
| 2,4,5-Trihydroxypyrimidine                                                          | $C_4H_4N_2O_3$        |   | 25.6 |      |             |
| 1-[2-Pyridyl]-2,2-dimethyl-2-morpholino ethanol                                     | $C_{12}H_{18}N_2O_2$  |  | 20.1 | 6.74 | 0.89 / 0.39 |
| 1,3,4-Oxadiazole-2(3H)-thione, 3-(2,6-dimethylmorpholinomethyl)-5-(2-methylphenyl)- | $C_{18}H_{21}N_3O_2S$ |  | 19.3 |      |             |
| Etidocaine                                                                          | $C_{17}H_{28}N_2O$    |  | 41.0 | 7.83 | 0.65 / n.a. |
| Naphthalene                                                                         | $C_{10}H_8$           |  | 58.0 | 8.30 | 0.52 / n.a. |



|                                                                                                                                     |                    |                                                                                     |      |       |             |
|-------------------------------------------------------------------------------------------------------------------------------------|--------------------|-------------------------------------------------------------------------------------|------|-------|-------------|
| L-Alanine, n-propargyloxycarbonyl-, ethyl ester                                                                                     | $C_9H_{13}NO_4$    | 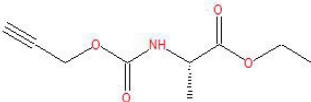   | 31.4 | 8.87  | 0.51 / n.a. |
| Naphthalene, 2-methyl-                                                                                                              | $C_{11}H_{10}$     |    | 76.5 | 10.15 | 0.58 / 0.23 |
| L-Alanine, n-propargyloxycarbonyl-, ethyl ester                                                                                     | $C_9H_{13}NO_4$    |    | 21.1 | 10.48 | 0.57 / 0.30 |
| D-Alanine, N-propargyloxycarbonyl-, propargyl ester                                                                                 | $C_{10}H_{11}NO_4$ |    | 14.9 |       |             |
| Naphthalene, 2-methyl-                                                                                                              | $C_{11}H_{10}$     |    | 39.5 | 10.72 | 0.41 / n.a. |
| Naphthalene, 1-methyl-                                                                                                              | $C_{11}H_{10}$     |   | 20.4 |       |             |
| Acenaphthylene                                                                                                                      | $C_{12}H_8$        |  | 48.1 | 15.46 | 0.33 / n.a. |
| Biphenylene                                                                                                                         | $C_{12}H_8$        |  | 31.1 |       |             |
| Benzo[ <i>f</i> ]isoindol-1,3-(1 <i>H</i> ,3 <i>H</i> )-dione, 3 <i>a</i> ,4,9,9 <i>a</i> -tetrahydro-4,9- <i>O</i> -benzo-2-hexyl- | $C_{24}H_{29}NO_2$ |  | 22.3 | 22.59 | 0.29 / n.a. |

Table 2: Detected molecules from  $A3\_2_{gas}$  as obtained using the NIST database as a reference. For low-percentage matches several possible molecules are listed. The highest peak, or the largest peak area in the chromatogram are used as references. Heights and areas of other peaks from other substances are given as a percentage relative to the respective reference and taken as their relative abundances. Not available (n.a.) area means that the area could not be determined due to asymmetric or overlapping peaks. Note that both estimates (height vs. area) can differ more or less, depending on the precise shape of a peak. Molecules containing elements other than *C*, *H*, *N* and *O* may represent mismatches in the database, or a contamination from the cleaning solution (*Deconex*, Borer).

| Name                                      | Molecular formula                            | Structure | Probability [%] | Delay time [min] | Relative height/ area [%] |
|-------------------------------------------|----------------------------------------------|-----------|-----------------|------------------|---------------------------|
| 3-Methyl-1,2-diazirine                    | C <sub>2</sub> H <sub>4</sub> N <sub>2</sub> |           | 60.8            | 0.28             | 100 / 100                 |
| 1-Buten-3-yne                             | C <sub>6</sub> H <sub>4</sub>                |           | 96.7            | 0.30             | 24.48 / 9.30              |
| Ammonia                                   | H <sub>3</sub> N                             |           | 98.5            | 0.34             | 12.68 / 2.73              |
| Benzene                                   | C <sub>6</sub> H <sub>6</sub>                |           | 69.6            | 0.44             | 10.81 / 3.91              |
| 1,3-Butadiyne                             | C <sub>4</sub> H <sub>2</sub>                |           | 97.9            | 0.46             | 12.79 / 6.22              |
| Hepta-4,6-diyne-2-ol                      | C <sub>7</sub> H <sub>8</sub> O              |           | 72.4            | 0.51             | 9.19 / 0.62               |
| Methyl isocyanide                         | C <sub>2</sub> H <sub>3</sub> N              |           | 42.0            | 0.56             | 7.65 / 1.99               |
| Acetonitrile                              | C <sub>2</sub> H <sub>3</sub> N              |           | 33.0            |                  |                           |
| Toluene                                   | C <sub>7</sub> H <sub>8</sub>                |           | 45.1            | 0.58             | 8.62 / 2.29               |
| Water                                     | H <sub>2</sub> O                             |           | 98.8            | 0.69             | 19.92 / 32.18             |
| Hepta-4,6-diyne-2-ol                      | C <sub>7</sub> H <sub>8</sub> O              |           | 48.1            | 0.71             | 16.54 / 7.62              |
| Ethylbenzene                              | C <sub>8</sub> H <sub>10</sub>               |           | 29.7            | 0.85             | 7.01 / 1.35               |
| Benzene, 1,3-dimethyl-                    | C <sub>8</sub> H <sub>10</sub>               |           | 25.1            |                  |                           |
| Bicyclo[4.2.0]octa-1,3,5-triene-7,8-dione | C <sub>8</sub> H <sub>4</sub> O <sub>2</sub> |           | 44.8            | 1.05             | 6.53 / 0.68               |
| 4,6-Octadiyn-3-one, 2-methyl-             | C <sub>9</sub> H <sub>10</sub> O             |           | 87.3            | 1.14             | 5.48 / 2.27               |
| Bicyclo[4.1.0]hepta-1,3,5-triene          | C <sub>7</sub> H <sub>6</sub>                |           | 45.3            | 1.29             | 5.56 / 0.18               |
| Styrene                                   | C <sub>8</sub> H <sub>8</sub>                |           | 31.0            | 1.64             | 5.17 / 0.85               |
| Bicyclo[4.2.0]octa-1,3,5-triene           | C <sub>8</sub> H <sub>8</sub>                |           | 23.7            |                  |                           |
| Hexa-1,3,5-triyne                         | C <sub>6</sub> H <sub>2</sub>                |           | 92.1            | 2.54             | 4.66 / 0.71               |

|                                                                            |                                                               |                                                                                     |      |      |             |
|----------------------------------------------------------------------------|---------------------------------------------------------------|-------------------------------------------------------------------------------------|------|------|-------------|
| Phenylethyne                                                               | C <sub>8</sub> H <sub>6</sub>                                 | 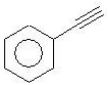   | 82.3 | 2.83 | 4.58 / 0.43 |
| Benzene, 1-ethynyl-4-methyl-                                               | C <sub>9</sub> H <sub>8</sub>                                 |    | 33.7 | 4.25 | 3.63 / 0.90 |
| Benzene, 1-propynyl-                                                       | C <sub>9</sub> H <sub>8</sub>                                 |    | 21.8 |      |             |
| d-Proline, N-methoxycarbonyl-, octadecyl ester                             | C <sub>25</sub> H <sub>47</sub> NO <sub>4</sub>               |    | 9.55 | 8.38 | 2.50 / 0.90 |
| d-Proline, N-methoxycarbonyl-, tetradecyl ester                            | C <sub>21</sub> H <sub>39</sub> NO <sub>4</sub>               |    | 5.98 |      |             |
| d-Proline, N-methoxycarbonyl-, hexadecyl ester                             | C <sub>23</sub> H <sub>43</sub> NO <sub>4</sub>               |   | 5.98 |      |             |
| 1,3-Benzenediol, o-methoxycarbonyl-, o'-(2-methoxybenzoyl)-                | C <sub>16</sub> H <sub>14</sub> O <sub>6</sub>                |  | 14.9 | 9.50 | 1.53 / n.a. |
| 1,2-Benzenediol, o-(4-methoxybenzoyl)-o'-(2,2,3,3,4,4,4-heptafluorobutyl)- | C <sub>18</sub> H <sub>11</sub> F <sub>7</sub> O <sub>5</sub> |  | 10.2 |      |             |
| 1,2-Benzisothiazole                                                        | C <sub>7</sub> H <sub>5</sub> NS                              |  | 44.2 |      |             |

|                                                  |                                                |                                                                                   |      |       |             |
|--------------------------------------------------|------------------------------------------------|-----------------------------------------------------------------------------------|------|-------|-------------|
| 1H-Pyrazolo[3,4-d]pyrimidin-4-amine              | C <sub>5</sub> H <sub>5</sub> N <sub>5</sub>   | 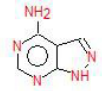 | 37.4 | 11.99 | 1.32 / n.a. |
| 2-Ethyl-hexoic acid                              | C <sub>8</sub> H <sub>16</sub> O <sub>2</sub>  |  | 58.4 | 12.56 | 1.61 / 0.37 |
| 3-Methylbutyl 2-ethylhexanoate                   | C <sub>13</sub> H <sub>26</sub> O <sub>2</sub> |  | 18.4 | 13.56 | 1.10 / n.a. |
| Hexanoic acid, 2-ethyl-, 1,1-dimethylethyl ester | C <sub>12</sub> H <sub>24</sub> O <sub>2</sub> |  | 16.2 |       |             |
| Iodoacetylene                                    | C <sub>2</sub> HI                              |  | 84.7 | 15.46 | 1.31 / 0.60 |
| Carbon disulfide                                 | CS <sub>2</sub>                                |  | 63.0 | 20.11 | 0.93 / n.a. |

Table 3: Detected molecules from *A3.3<sub>gas</sub>* as obtained using the NIST database as a reference. For low-percentage matches several possible molecules are listed. The highest peak, or the largest peak area in the chromatogram are used as references. Heights and areas of other peaks from other substances are given as a percentage relative to the respective reference and taken as their relative abundances. Not available (n.a.) area means that the area could not be determined due to asymmetric or overlapping peaks. Note that both estimates (height vs. area) can differ more or less, depending on the precise shape of a peak. Molecules containing elements other than *C*, *H*, *N* and *O* may represent mismatches in the database, or a contamination from the cleaning solution (*Deconex*, Borer). Fluorine may originate from the teflon used for sealing.

| Name                                                | Molecular formula                                            | Structure                                                                          | Probability [%] | Delay time [min] | Relative height/ area [% / %] | Concentration [(± 1.026) mol/l] |
|-----------------------------------------------------|--------------------------------------------------------------|------------------------------------------------------------------------------------|-----------------|------------------|-------------------------------|---------------------------------|
| Pentane                                             | C <sub>5</sub> H <sub>12</sub>                               |   | 80.8            | 0.12             | 14.97 / 8.76                  | 0.401                           |
| Ethyl ether                                         | C <sub>4</sub> H <sub>10</sub> O                             |   | 87.7            | 0.13             | 13.68 / 7.83                  | 0.389                           |
| Cyclohexane                                         | C <sub>6</sub> H <sub>12</sub>                               |   | 76.0            | 0.14             | 9.48 / 5.75                   | 0.232                           |
| Pentane                                             | C <sub>5</sub> H <sub>12</sub>                               |   | 53.5            | 0.29             | 100 / 100                     | 3.031                           |
| Ethyl ether                                         | C <sub>4</sub> H <sub>10</sub> O                             |   | 73.5            | 0.30             | 62.80 / 62.79                 | 2.614                           |
| Cyclohexane                                         | C <sub>6</sub> H <sub>12</sub>                               |   | 74.4            | 0.32             | 54.29 / 73.32                 | <b>3.090</b>                    |
| 4-Hydroxy-5-methyl-3-phenyl-δ(2)-1,2,4-oxadiazoline | C <sub>9</sub> H <sub>10</sub> N <sub>2</sub> O <sub>2</sub> |  | 37.0            | 22.60            | 0.28 / 0.35                   | 0.007                           |

Table 4: Detected molecules from *A3.1liquid* as obtained using the NIST database as a reference. For low-percentage matches several possible molecules are listed. The highest peak, or the largest peak area in the chromatogram are used as references. Heights and areas of other peaks from other substances are given as a percentage relative to the respective reference and taken as their relative abundances. Not available (n.a.) area means that the area could not be determined due to asymmetric or overlapping peaks. Note that both estimates (height vs. area) can differ more or less, depending on the precise shape of a peak. For estimating the molar concentration, we compared the areas and used the known solvent concentration as reference (printed in bold).

| Name                                                                    | Molecular formula                                           | Structure                                                                           | Probability [%] | Delay time [min] | Relative height/ area [% / %] | Concentration [(± 1.911) mol/l] |
|-------------------------------------------------------------------------|-------------------------------------------------------------|-------------------------------------------------------------------------------------|-----------------|------------------|-------------------------------|---------------------------------|
| 1-Propanol, 2-methyl-                                                   | C <sub>4</sub> H <sub>10</sub> O                            |    | 62.2            | 0.23             | 19.45 / 33.27                 | 2.073                           |
| Cyclohexane                                                             | C <sub>6</sub> H <sub>12</sub>                              |    | 78.9            | 0.25             | 12.04 / 13.06                 | 1.032                           |
| Butane, 2-methyl-                                                       | C <sub>5</sub> H <sub>12</sub>                              |    | 36.1            | 0.28             | 100 / 87.44                   | 3.162                           |
| Pentane                                                                 | C <sub>5</sub> H <sub>12</sub>                              |    | 34.7            |                  |                               | 3.039                           |
| Ethane, 1,2-diethoxy-                                                   | C <sub>6</sub> H <sub>14</sub> O <sub>2</sub>               |    | 52.5            | 0.28             | 83.33 / 34.71                 | 1.825                           |
| Ethyl ether                                                             | C <sub>4</sub> H <sub>10</sub> O                            |    | 40.3            |                  |                               | 1.401                           |
| 2H-Pyran, 3,4-dihydro                                                   | C <sub>6</sub> H <sub>8</sub> O                             |    | 47.3            | 0.30             | 71.30 / 100                   | 4.738                           |
| Cyclohexane                                                             | C <sub>6</sub> H <sub>12</sub>                              |    | 35.4            | 0.32             | 32.68 / 87.14                 | <b>3.090</b>                    |
| 1,2,4-Triazol-3-amine, 5-(3-nitrophenyl)-                               | C <sub>8</sub> H <sub>7</sub> N <sub>5</sub> O <sub>2</sub> |   | 20.1            | 11.78            | 0.33 / n.a.                   | n.a.                            |
| p-Benzoquinone, 2,5-bis(1,1,3,3-tetramethylbutyl)-                      | C <sub>22</sub> H <sub>36</sub> O <sub>2</sub>              |  | 17.7            |                  |                               | n.a.                            |
| 2,6-Bis(1,1-dimethylethyl)-4-methyl-4-isopropylcyclohexa-2,5-dien-1-one | C <sub>18</sub> H <sub>30</sub> O                           |  | 12.9            |                  |                               | n.a.                            |
| (E)-tert-Butylsulfinyl-2-phenylethene                                   | C <sub>12</sub> H <sub>16</sub> OS                          |  | 50.1            |                  |                               | 15.43                           |

|                                      |                |                                                                                   |      |       |             |      |
|--------------------------------------|----------------|-----------------------------------------------------------------------------------|------|-------|-------------|------|
| 1,2,4,5-<br>Benzenetetracarbonitrile | $C_{10}H_2N_4$ | 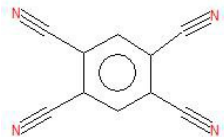 | 84.7 | 22.57 | 0.16 / n.a. | n.a. |
|--------------------------------------|----------------|-----------------------------------------------------------------------------------|------|-------|-------------|------|

Table 5: Detected molecules from *A3-2<sub>liquid</sub>* as obtained using the NIST database as a reference. For low-percentage matches several possible molecules are listed. The highest peak, or the largest peak area in the chromatogram are used as references. Heights and areas of other peaks from other substances are given as a percentage relative to the respective reference and taken as their relative abundances. Not available (n.a.) area means that the area could not be determined due to asymmetric or overlapping peaks. Note that both estimates (height vs. area) can differ more or less, depending on the precise shape of a peak. For estimating the molar concentration, we compared the areas and used the known solvent concentration as reference (printed in bold). Molecules containing elements other than *C*, *H*, *N* and *O* may represent mismatches in the database, or a contamination from the cleaning solution (*Deconex*, Borer).

| Name                                                                       | Molecular formula                                             | Structure | Probability [%] | Delay time [min] | Relative height/ area [% / %] | Concentration [(± 1.980) mol/l] |
|----------------------------------------------------------------------------|---------------------------------------------------------------|-----------|-----------------|------------------|-------------------------------|---------------------------------|
| 1-Propanol, 2-methyl-                                                      | C <sub>4</sub> H <sub>10</sub> O                              |           | 63.5            | 0.23             | 4.03 / 2.36                   | 0.240                           |
| Cyclohexane                                                                | C <sub>6</sub> H <sub>12</sub>                                |           | 80.7            | 0.25             | 4.14 / 0.97                   | 0.126                           |
| Pentane                                                                    | C <sub>5</sub> H <sub>12</sub>                                |           | 29.2            | 0.28             | 100 / 68.64                   | 3.212                           |
| 2-Oxetanone, 4-methyl-                                                     | C <sub>4</sub> H <sub>6</sub> O <sub>2</sub>                  |           | 20.6            |                  |                               | 2.266                           |
| Acetic acid, (2-ethoxy)ethoxy-, methyl ester                               | C <sub>7</sub> H <sub>14</sub> O <sub>4</sub>                 |           | 38.6            | 0.28             | 85.19 / 36.79                 | 2.276                           |
| Allyl isocyanate                                                           | C <sub>4</sub> H <sub>5</sub> NO                              |           | 72.1            | 0.30             | 70.83 / 100                   | 11.553                          |
| Cyclohexane                                                                | C <sub>6</sub> H <sub>12</sub>                                |           | 60.5            | 0.31             | 50.00 / 31.88                 | <b>3.090</b>                    |
| Carbon monoxide                                                            | CO                                                            |           | 74.2            | 0.57             | 1.78 / 0.24                   | 0.028                           |
| Water                                                                      | H <sub>2</sub> O                                              |           | 82.9            | 0.67             | 2.70 / 3.83                   | 0.509                           |
| Di-tert-butyl peroxide                                                     | C <sub>8</sub> H <sub>18</sub> O <sub>2</sub>                 |           | 58.9            | 3.38             | 0.81 / 0.16                   | 0.014                           |
| Oxalic acid, butyl propyl ester                                            | C <sub>9</sub> H <sub>16</sub> O <sub>4</sub>                 |           | 17.6            | 9.73             | 0.42 / 0.16                   | 0.005                           |
| di-tert-Butyl dicarbonate                                                  | C <sub>10</sub> H <sub>18</sub> O <sub>5</sub>                |           | 10.1            |                  |                               | 0.003                           |
| Oxalic acid, isobutyl propyl ester                                         | C <sub>9</sub> H <sub>16</sub> O <sub>4</sub>                 |           | 7.95            |                  |                               | 0.002                           |
| 1,2-Benzenediol, o-(4-methoxybenzoyl)-o'-(2,2,3,3,4,4,4-heptafluorobutyl)- | C <sub>18</sub> H <sub>11</sub> F <sub>7</sub> O <sub>5</sub> |           | 8.07            |                  |                               | 0.002                           |



|                                                                 |                   |                                                                                     |      |       |             |       |
|-----------------------------------------------------------------|-------------------|-------------------------------------------------------------------------------------|------|-------|-------------|-------|
| 1,2-Benzenediol, o-(2-methoxybenzoyl)-o-(propargyloxycarbonyl)- | $C_{16}H_{14}O_6$ | 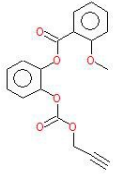   | 6.81 | 10.22 | 0.40 / 0.17 | 0.002 |
| 1,3-Benzenediol, o-(2-methoxybenzoyl)-o-(propargyloxycarbonyl)- | $C_{16}H_{14}O_6$ |    | 6.28 |       |             | 0.002 |
| Isophthalic acid, butyl 2-isopropylphenyl ester                 | $C_{21}H_{24}O_4$ |    | 23.7 |       |             | 0.007 |
| Terephthalic acid, isobutyl 2-isopropylphenyl ester             | $C_{21}H_{24}O_4$ |    | 9.38 | 11.46 | 0.33 / 0.18 | 0.003 |
| Benzothiazole                                                   | $C_6H_5NS$        |   | 34.0 |       |             | 0.015 |
| 1H-Pyrazolo[3,4-d]pyrimidin-4-amine                             | $C_5H_5N_5$       |  | 21.3 | 11.87 | 0.35 / 0.27 | 0.009 |
| Benzothiazole                                                   | $C_6H_5NS$        |  | 48.7 |       |             | n.a.  |
| 1,2-Benzisothiazole                                             | $C_6H_5NS$        |  | 26.6 | 11.97 | 0.23 / n.a. | n.a.  |
| 2-Ethyl-hexoic acid                                             | $C_{11}H_{20}O_2$ |  | 73.2 | 12.53 | 0.27 / n.a. | n.a.  |
| 3-Methylbutyl 2-ethylhexanoate                                  | $C_{19}H_{36}O_2$ |  | 30.2 |       |             | n.a.  |
|                                                                 |                   |                                                                                     |      | 13.52 | 0.36 / n.a. |       |

|                                                  |                   |                                                                                   |      |  |      |
|--------------------------------------------------|-------------------|-----------------------------------------------------------------------------------|------|--|------|
| Hexanoic acid, 2-ethyl-, 1,1-dimethylethyl ester | $C_{12}H_{24}O_2$ | 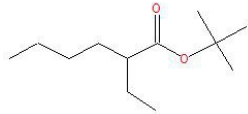 | 18.3 |  | n.a. |
|--------------------------------------------------|-------------------|-----------------------------------------------------------------------------------|------|--|------|

Table 6: Detected Molecules from *A3\_3liquid* as obtained using the NIST database as a reference. For low-percentage matches several possible molecules are listed. The highest peak, or the largest peak area in the chromatogram are used as references. Heights and areas of other peaks from other substances are given as a percentage relative to the respective reference and taken as their relative abundances. Not available (n.a.) area means that the area could not be determined due to asymmetric or overlapping peaks. Note that both estimates (height vs. area) can differ more or less, depending on the precise shape of a peak. For estimating the molar concentration, we compared the areas and used the known solvent concentration as reference (printed in bold). Molecules containing elements other than *C*, *H*, *N* and *O* may represent mismatches in the database, or a contamination from the cleaning solution (*Deconex*, Borer). Fluorine may originate from the teflon used for sealing.

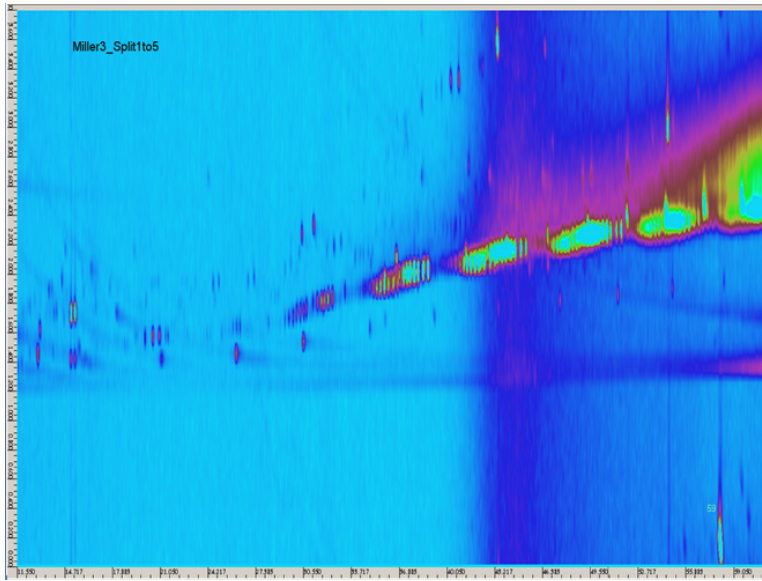

Fig. 1: Contour plot of the procedural blank.
